# Supplementary material for: Self-driven micromotors loaded with photosensitive adhesives and their application in dentin sensitivity
Source: Royal Society of Chemistry journal article supplement (doi:10.1039/d4tb02361g), 2024-12-25
Supplement: d4tb02361g1.pdf [file d4tb02361g1.pdf]

## Supporting Information

### **Preparation of self-driven micromotors loaded with photosensitive adhesives and their application in dentin sensitivity**

Qianyang Zhang <sup>c</sup>, Yiyang Zhang <sup>c</sup>, Wei Wu <sup>c</sup>, Yingjie Wu <sup>\*b</sup>, Zhuling Jiang <sup>\*a</sup>, and Narisu Hu <sup>\*a</sup>

a Oral Implant Center, The Second Affiliated Hospital of Harbin Medical University, Harbin 150086, People's Republic of China.

b School of Medicine and Health, Harbin Institute of Technology, Harbin, 150001, People's Republic of China.

c Hard Tissue Development and Regeneration Laboratory, Harbin Medical University, Harbin 150086, People's Republic of China.

\*Corresponding authors:

[hmuhunarisu@163.com](mailto:hmuhunarisu@163.com) (N.R.S. Hu);

[wuyingjie@hit.edu.cn](mailto:wuyingjie@hit.edu.cn) (Y.J. Wu);

[jzlaileen@163.com](mailto:jzlaileen@163.com)

#### ■ **Supplementary videos**

**Video S1. Typical video recording of the motors in H<sub>2</sub>O.**

**Video S2. Typical video recording of the motors in H<sub>2</sub>O and 0.5% H<sub>2</sub>O<sub>2</sub>.**

**Video S3. Typical video recording of the motors in H<sub>2</sub>O and 1% H<sub>2</sub>O<sub>2</sub>.**

**Video S4. Typical video recording of the motors in H<sub>2</sub>O and 3% H<sub>2</sub>O<sub>2</sub>.**

**Video S5. Typical video recording of the motors in Artificial Saliva and 3% H<sub>2</sub>O<sub>2</sub>.**

**Video S6. Typical video recording of the motors in Ringer's fluid and 3% H<sub>2</sub>O<sub>2</sub>.**

## ■ Supplementary Figures

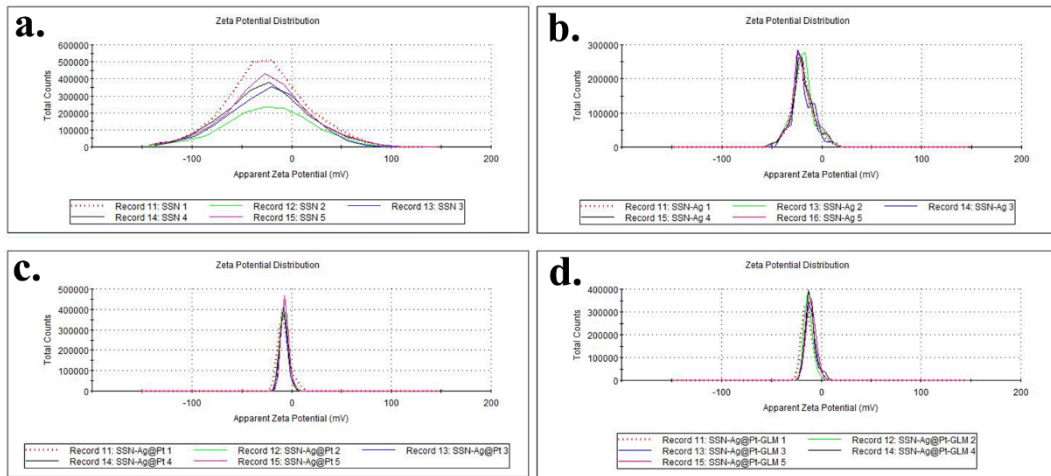

**Figure S1.** Zeta potential distribution curve of SSN (a), SSN-Ag (b), SSN-Ag@Pt (c), and SSN-Ag@Pt-GLM (d).

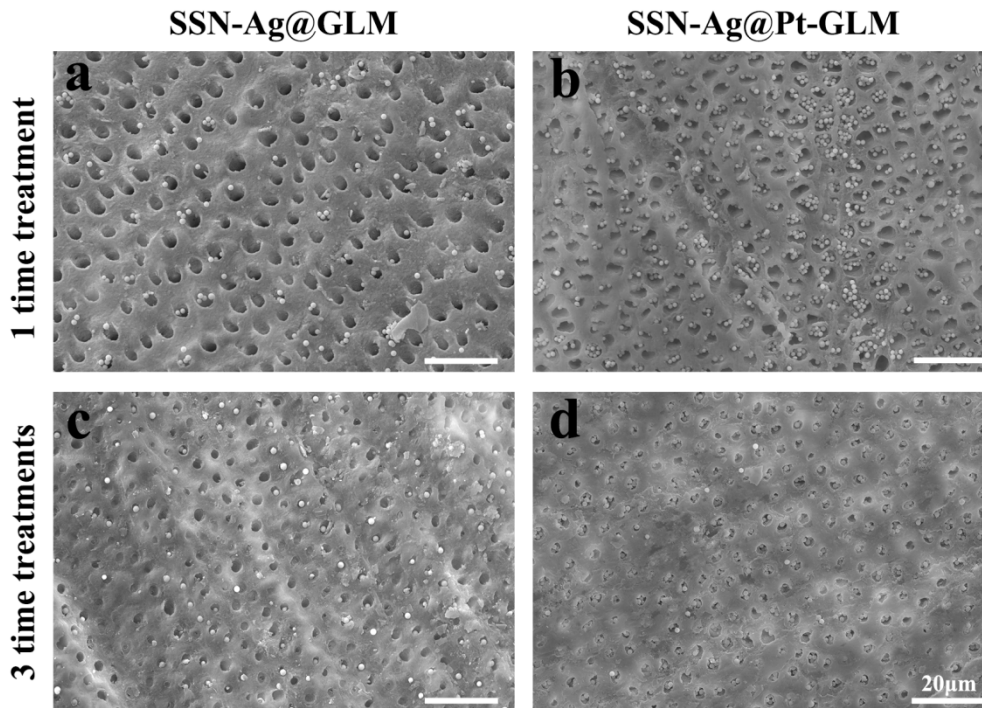

**Figure S2.** (a, c) Typical SEM images after treated once (a) and 3 times (c) with SSN-Ag@GLM. (b, d) Typical SEM images after 1 (b) and 3 (d) treatment with SSN-Ag@Pt-GLM.

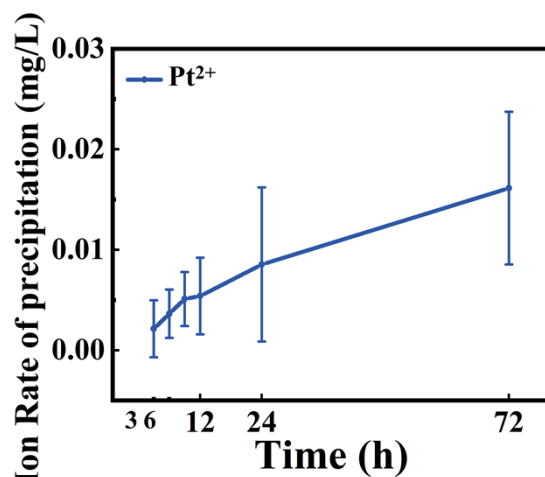

**Figure S3.** In vitro platinum ion release analysis of SSN-Ag@Pt-GLM.

## ■ Supplementary Tables

**Table S1.** The cell survival rate of pure HGnFs and HGnFs incubated with different concentrations of SSN-Ag@Pt-GLM

| Group               | Drug Concentration(mg/ml) |        |         |         |         |
|---------------------|---------------------------|--------|---------|---------|---------|
|                     | Control                   | 1. 25  | 2. 5    | 5       | 10      |
| Viability<br>24h(%) | 100.00                    | 95. 64 | 112. 48 | 113. 45 | 115. 80 |

**Table S2.** Percent elemental analysis (Si, O, C, Ag, Pt) of SSN-Ag@Pt-GLM

| Element | Type of signal | Line | Apparent concentration | K ratio | Wt%    | Wt% Sigma | At%    | Sample |
|---------|----------------|------|------------------------|---------|--------|-----------|--------|--------|
| Si      | EDS            | K    | 51.66                  | 0.40932 | 72.04  | 0.26      | 59.86  | SiO2   |
| O       | EDS            | K    | 0.97                   | 0.00325 | 3.28   | 0.06      | 4.79   | SiO2   |
| C       | EDS            | K    | 0.78                   | 0.00783 | 17.55  | 0.29      | 34.09  | C Vit  |
| Ag      | EDS            | L    | 1.73                   | 0.01732 | 4.27   | 0.05      | 0.92   | Ag     |
| Pt      | EDS            | M    | 0.84                   | 0.00836 | 2.86   | 0.06      | 0.34   | Pt     |
| Gross   |                |      |                        |         | 100.00 |           | 100.00 |        |
